# Supplementary material for: Prevalence of mismatch repair deficiency and Lynch syndrome in a cohort of unselected small bowel adenocarcinomas
Source: PubMed Central journal article supplement — J Clin Pathol. 2020 Oct 12;74(11):724–9. doi: 10.1136/jclinpath-2020-207040 (PMC8543220; doi:10.1136/jclinpath-2020-207040), 2020-10-12
Supplement: jclinpath-2020-207040supp001.pdf [file jclinpath-2020-207040supp001.pdf]

## Supplemental Methods

### *Immunohistochemical staining*

4µm FFPE sections were deparaffinized with xylene and rehydrated in ethanol. A 0.3% H<sub>2</sub>O<sub>2</sub> solution was used to block endogenous peroxidase, and microwave-mediated antigen retrieval was performed in Tris-EDTA, pH 9.0. Sections were incubated overnight with primary antibodies against MLH1 (clone ES05, 1:50; Agilent, USA), MSH2 (clone FE11, 1:200, Agilent, USA), MSH6 (clone EPR3945, 1:200, Genetex, USA) or PMS2 (clone EP51, 1:40, Agilent, USA) at 4°C. After washing, they were then incubated for 30 minutes with poly-HRP (VWRKDPVM110HRP, ImmunoLogic), visualised using a DAB+ substrate chromogen system (K3468; Agilent) and counterstained with haematoxylin. Finally, the sections were dehydrated and mounted with coverslips.

### *Targeted Next Generation Sequencing (NGS)*

Sequencing was performed using the Ion Torrent platform according to the manufacturer's recommendations. In brief, 21 ng/14 µl isolated DNA was used to prepare two primer pools. After the first PCR, the pools were combined and a new PCR run was performed to digest the primers. A third PCR was then performed to add barcodes to the samples. After purification using AMPureXP beads (A63882; Beckman Coulter), the NGS libraries were pooled, diluted to 60 pmol/L and loaded on a chip using the Ion Chef. Sequencing was subsequently performed in an Ion GeneStudio S5 Series sequencer.
