# Supplementary material for: Prevalence of mismatch repair deficiency and Lynch syndrome in a cohort of unselected small bowel adenocarcinomas
Source: PubMed Central journal article supplement — J Clin Pathol. 2020 Oct 12;74(11):724–9. doi: 10.1136/jclinpath-2020-207040 (PMC8543220; doi:10.1136/jclinpath-2020-207040), 2020-10-12
Supplement: jclinpath-2020-207040supp002.pdf [file jclinpath-2020-207040supp002.pdf]

**Supplemental table 1** – msCRC panel genes and coverage

| <b>Name</b>   | <b>Chromosome</b> | <b>Exons</b> | <b>Coverage (%)</b> |
|---------------|-------------------|--------------|---------------------|
| <i>APC</i>    | 5                 | 16           | 100                 |
| <i>BMPR1A</i> | 10                | 11           | 94.3                |
| <i>BRCA1</i>  | 17                | 23           | 100                 |
| <i>BRCA2</i>  | 13                | 26           | 100                 |
| <i>ENG</i>    | 9                 | 15           | 100                 |
| <i>MLH1</i>   | 3                 | 21           | 100                 |
| <i>MSH2</i>   | 2                 | 17           | 100                 |
| <i>MSH3</i>   | 5                 | 24           | 99.8                |
| <i>MSH6</i>   | 2                 | 12           | 100                 |
| <i>MUTYH</i>  | 1                 | 16           | 100                 |
| <i>NTHL1</i>  | 16                | 6            | 100                 |
| <i>PALB2</i>  | 16                | 42           | 100                 |
| <i>PMS2</i>   | 7                 | 15           | 96.8                |
| <i>POLD1</i>  | 19                | 26           | 100                 |
| <i>POLE</i>   | 12                | 40           | 100                 |
| <i>PTEN</i>   | 10                | 10           | 98.9                |
| <i>RNF43</i>  | 17                | 9            | 99.9                |
| <i>SMAD4</i>  | 18                | 11           | 98.5                |
| <i>STK11</i>  | 19                | 9            | 100                 |
| <i>TP53</i>   | 17                | 12           | 100                 |
| <i>KRAS</i>   | 12                | 2,3,4        | Hotspots            |
| <i>HRAS</i>   | 11                | 2,3          | Hotspots            |
| <i>NRAS</i>   | 1                 | 2,3,4        | Hotspots            |
| <i>BRAF</i>   | 7                 | 11,15        | Hotspots            |
| <i>CTNNB1</i> | 3                 | 8            | Hotspots            |
| <i>MYC</i>    | 8                 | CNV          | Hotspots            |
