# Supplementary material for: Prevalence of mismatch repair deficiency and Lynch syndrome in a cohort of unselected small bowel adenocarcinomas
Source: PubMed Central journal article supplement — J Clin Pathol. 2020 Oct 12;74(11):724–9. doi: 10.1136/jclinpath-2020-207040 (PMC8543220; doi:10.1136/jclinpath-2020-207040), 2020-10-12
Supplement: jclinpath-2020-207040supp004.pdf [file jclinpath-2020-207040supp004.pdf]

**Supplemental Table 3 - clinical details of Lynch syndrome patients**

Abbreviations: n.o.s. = not otherwise specified

| Study ID | Gene | Sex | Age decade at small bowel cancer diagnosis (years) | Location of tumour    | Differentiation grade as reported in PA-report | Aberrent IHC, MSI or Lynch diagnosis in pathology report | History of Lynch-associated malignancy | Number of Lynch-associated malignancies (excluding small bowel) | History of other malignancy (non-Lynch associated) | Number of other malignancies (non-Lynch associated) |
|----------|------|-----|----------------------------------------------------|-----------------------|------------------------------------------------|----------------------------------------------------------|----------------------------------------|-----------------------------------------------------------------|----------------------------------------------------|-----------------------------------------------------|
| 3        | MSH2 | m   | 40-49                                              | small bowel<br>n.o.s. | moderate                                       | yes                                                      | yes                                    | 1                                                               | no                                                 | -                                                   |
| 85       | MLH1 | m   | 30-39                                              | ileum                 | moderate                                       | yes                                                      | yes                                    | 1                                                               | no                                                 | -                                                   |
| 98       | MSH6 | m   | 70-79                                              | duodenum              | moderate                                       | no                                                       | no                                     | -                                                               | yes                                                | 1                                                   |
| 119      | PMS2 | m   | 70-79                                              | duodenum              | moderate                                       | yes                                                      | no                                     | -                                                               | no                                                 | -                                                   |
| 124      | MSH2 | v   | 60-69                                              | jejunum               | moderate                                       | yes                                                      | yes                                    | 4                                                               | no                                                 | -                                                   |
| 206      | MLH1 | f   | 30-39                                              | duodenum              | moderate                                       | no                                                       | no                                     | -                                                               | no                                                 | -                                                   |
| 236      | MSH6 | m   | 40-49                                              | duodenum              | moderate                                       | yes                                                      | yes                                    | 1                                                               | no                                                 | -                                                   |
| 316      | MSH2 | f   | 50-59                                              | jejunum               | could not be assessed                          | yes                                                      | yes                                    | 2                                                               | no                                                 | -                                                   |
| 335      | MSH2 | f   | 60-69                                              | ileum                 | moderate                                       | yes                                                      | yes                                    | 1                                                               | yes                                                | 1                                                   |
| 363      | MSH2 | m   | 40-49                                              | duodenum              | moderate to high                               | yes                                                      | no                                     | -                                                               | no                                                 | -                                                   |
| 379      | PMS2 | m   | 50-59                                              | duodenum              | moderate                                       | no                                                       | no                                     | -                                                               | no                                                 | -                                                   |
| 414      | MSH6 | f   | 50-59                                              | duodenum              | moderate                                       | yes                                                      | yes                                    | 1                                                               | yes                                                | 1                                                   |
| 426      | MLH1 | m   | 40-49                                              | duodenum              | poorly/high grade                              | yes                                                      | no                                     | -                                                               | no                                                 | -                                                   |
| 474      | MSH2 | f   | 50-59                                              | duodenum              | moderate                                       | no                                                       | yes                                    | 1                                                               | no                                                 | -                                                   |
| 480      | MLH1 | m   | 60-69                                              | duodenum              | moderate                                       | yes                                                      | yes                                    | 2                                                               | no                                                 | -                                                   |
| 595      | MSH6 | m   | 50-59                                              | jejunum               | poorly/high grade                              | no                                                       | no                                     | -                                                               | no                                                 | -                                                   |
| 720      | MSH2 | m   | 50-59                                              | duodenum              | moderate                                       | no                                                       | yes                                    | 1                                                               | no                                                 | -                                                   |

|     |      |   |       |                    |                       |     |     |   |     |   |
|-----|------|---|-------|--------------------|-----------------------|-----|-----|---|-----|---|
| 722 | MSH6 | f | 50-59 | ileum              | could not be assessed | no  | yes | 2 | yes | 1 |
| 723 | MLH1 | m | 50-59 | small bowel n.o.s. | moderate              | yes | yes | 1 | yes | 1 |
| 746 | MLH1 | m | 50-59 | duodenum           | moderate              | yes | yes | 3 | yes | 1 |
